# Supplementary material for: Impact of the Russia-Ukraine conflict on the quality and quantity of Malaysia’s palm oil production: A time series analysis
Source: PLoS One. 2024 May 6;19(5):e0302405. doi: 10.1371/journal.pone.0302405 (PMC11073669; doi:10.1371/journal.pone.0302405)
Supplement: S1 Dataset — (XLSX) [file pone.0302405.s001.xlsx]

## Sheet: Data
	Monthly Oil Extraction Rate: Jan 2014 - Dec 2023 (Percent)													Forecasted Data from 2024-2027
		2014	2015	2016	2017	2018	2019	2020	2021	2022	2023				2024	2025	2026	2027
	Jan	20.16	19.85	20.53	19.72	19.01	19.87	19.88	19.02	19.68	20.24			Jan	20.63	20.58	20	19.6
	Feb	20.83	20.25	19.98	19.54	19.84	20.22	19.81	19.64	19.39	20.17			Feb	19.95	20.54	19.76	19.09
	Mar	20.71	20.49	20.15	19.59	20.01	20.27	20.07	19.67	19.57	20.75			Mar	20.21	20.05	19.57	19.74
	Apr	20.74	20.18	20.23	19.72	20.22	20.07	19.94	19.83	19.83	20.71			Apr	20.45	20.14	19.59	19.98
	May	20.63	20.23	19.7	19.82	20.04	20	19.87	19.99	19.98	20.74			May	20.22	20.22	19.7	20.19
	Jun	20.6	20.14	19.64	19.71	20.07	19.89	19.47	20.27	19.66	20.64			Jun	20.23	19.77	19.8	20.06
	Jul	20.33	20.43	20.13	19.71	19.95	20.11	19.59	19.91	19.86	20.61			Jul	20.15	19.66	19.72	20.07
	Aug	20.41	20.19	20.57	19.74	20.32	20.61	20.12	20.16	19.67	20.37			Aug	20.39	20.07	19.71	19.97
	Sep	20.71	20.96	20.44	19.7	20.06	20.88	20.14	20.32	19.65	20.4			Sep	20.22	20.51	19.74	20.27
	Oct	20.95	21.31	20.64	19.99	20.14	20.35	20.36	20.58	19.78	20.67			Oct	20.86	20.45	19.7	20.09
	Nov	20.8	20.62	20.06	19.7	19.97	20.33	20.09	20.22	19.76	20.91			Nov	21.25	20.62	19.95	20.13
	Dec	20.6	20.56	19.98	19.58	19.83	19.71	19.71	20.07	19.55	20.81			Dec	20.7	20.13	19.73	19.99
	Source: MPOB
	Monthly Fresh Fruit Bunch (Buah Tandan Segar) Yield of Oil Palm Estates: Jan 2014 - Dec 2023 (Tonnes/Hectare)													Forecasted Data from 2024-2027
		2014	2015	2016	2017	2018	2019	2020	2021	2022	2023				2024	2025	2026	2027
	Jan	1.49	1.15	1.04	1.2	1.48	1.52	1.06	1.03	1.1	1.49			Jan	1.37	1.34	1.36	1.67
	Feb	1.21	1.07	0.97	1.14	1.22	1.34	1.1	0.97	0.99	1.49			Feb	1.15	1.04	1.2	1.48
	Mar	1.39	1.33	1.1	1.32	1.38	1.42	1.19	1.2	1.18	1.21			Mar	1.07	0.97	1.14	1.22
	Apr	1.45	1.55	1.17	1.38	1.36	1.42	1.41	1.28	1.17	1.39			Apr	1.33	1.1	1.32	1.38
	May	1.53	1.64	1.27	1.45	1.32	1.4	1.44	1.33	1.2	1.45			May	1.55	1.17	1.38	1.36
	Jun	1.43	1.61	1.45	1.37	1.17	1.34	1.65	1.35	1.26	1.53			Jun	1.64	1.27	1.45	1.32
	Jul	1.55	1.68	1.47	1.61	1.28	1.49	1.59	1.3	1.28	1.43			Jul	1.61	1.45	1.37	1.17
	Aug	1.94	1.89	1.54	1.61	1.39	1.55	1.62	1.44	1.45	1.55			Aug	1.68	1.47	1.61	1.28
	Sep	1.8	1.81	1.57	1.62	1.62	1.57	1.65	1.45	1.51	1.94			Sep	1.89	1.54	1.61	1.39
	Oct	1.79	1.84	1.51	1.78	1.7	1.57	1.5	1.46	1.54	1.8			Oct	1.81	1.57	1.62	1.62
	Nov	1.68	1.57	1.46	1.75	1.63	1.35	1.33	1.41	1.45	1.79			Nov	1.84	1.51	1.78	1.7
	Dec	1.37	1.34	1.36	1.67	1.61	1.22	1.19	1.26	1.38	1.68			Dec	1.57	1.46	1.75	1.63
	Source: MPOB
	Monthly Palm Oil Exports: Jan 2014 - Dec 2023 (Tonnes)													Forecasted Data from 2024-2027
		2014	2015	2016	2017	2018	2019	2020	2021	2022	2023				2024	2025	2026	2027
	Jan	1.36796e+06	1.19178e+06	1.27919e+06	1.28778e+06	1.47267e+06	1.68089e+06	1.21357e+06	947392	1.15583e+06	1351352			Jan	1528995	1517228	1320848	1424170
	Feb	1.35144e+06	972646	1.08886e+06	1.10777e+06	1.24362e+06	1.32461e+06	1.08953e+06	900558	1.11151e+06	1361685			Feb	1319211	1369143	1300278	1454339
	Mar	1.24577e+06	1.19423e+06	1.33593e+06	1.2658e+06	1.56618e+06	1.62075e+06	1.18497e+06	1189859	1.28146e+06	1355312			Mar	1103613	1194782	1180518	1323252
	Apr	1.26865e+06	1.17782e+06	1.17291e+06	1.28412e+06	1.53041e+06	1.6545e+06	1.23648e+06	1350777	1.06824e+06	1287164			Apr	1159986	1282592	1233572	1474379
	May	1.41696e+06	1625592	1.28245e+06	1.50614e+06	1.29163e+06	1.71572e+06	1.36935e+06	1268424	1.36971e+06	1275645			May	1171082	1214362	1265018	1509233
	Jun	1.48319e+06	1.69717e+06	1.14183e+06	1.37989e+06	1.12952e+06	1.39714e+06	1.70663e+06	1418494	1.19392e+06	1363556			Jun	1453832	1256721	1415023	1373861
	Jul	1.44606e+06	1.6099e+06	1.38472e+06	1.39911e+06	1.19667e+06	1.48648e+06	1.78328e+06	1402315	1.32134e+06	1437981			Jul	1605212	1185249	1393165	1221855
	Aug	1.4378e+06	1.6083e+06	1.82444e+06	1.48821e+06	1.0999e+06	1.73622e+06	1.57808e+06	1167188	1.29818e+06	1443007			Aug	1608130	1309340	1396862	1206189
	Sep	1.64329e+06	1.68088e+06	1.46117e+06	1.51928e+06	1.61948e+06	1.40909e+06	1.61215e+06	1611518	1.41924e+06	1439765			Sep	1608237	1629781	1453690	1140064
	Oct	1.61146e+06	1.71192e+06	1.43607e+06	1.53805e+06	1.57849e+06	1.64197e+06	1.67438e+06	1420391	1.50577e+06	1566380			Oct	1653430	1524890	1494496	1438310
	Nov	1.51405e+06	1.49976e+06	1.37041e+06	1.35638e+06	1.37568e+06	1.40564e+06	1.30381e+06	1465518	1.51303e+06	1594424			Nov	1689819	1469635	1521591	1525518
	Dec	1.51962e+06	1.48421e+06	1.26796e+06	1.42742e+06	1.38331e+06	1.39805e+06	1.64283e+06	1423821	1.47385e+06	1544424			Dec	1571582	1407908	1418812	1432307
	Source: MPOB

## Sheet: Palm Oil Quality Based on OER
Date	Palm Oil Quality Based on Extraction Rate (OER) in Percentage
2014-01-01	20.16
2014-02-01	20.83
2014-03-01	20.71
2014-04-01	20.74
2014-05-01	20.63
2014-06-01	20.6
2014-07-01	20.33
2014-08-01	20.41
2014-09-01	20.71
2014-10-01	20.95
2014-11-01	20.8
2014-12-01	20.6
2015-01-01	19.85
2015-02-01	20.25
2015-03-01	20.49
2015-04-01	20.18
2015-05-01	20.23
2015-06-01	20.14
2015-07-01	20.43
2015-08-01	20.19
2015-09-01	20.96
2015-10-01	21.31
2015-11-01	20.62
2015-12-01	20.56
2016-01-01	20.53
2016-02-01	19.98
2016-03-01	20.15
2016-04-01	20.23
2016-05-01	19.7
2016-06-01	19.64
2016-07-01	20.13
2016-08-01	20.57
2016-09-01	20.44
2016-10-01	20.64
2016-11-01	20.06
2016-12-01	19.98
2017-01-01	19.72
2017-02-01	19.54
2017-03-01	19.59
2017-04-01	19.72
2017-05-01	19.82
2017-06-01	19.71
2017-07-01	19.71
2017-08-01	19.74
2017-09-01	19.7
2017-10-01	19.99
2017-11-01	19.7
2017-12-01	19.58
2018-01-01	19.01
2018-02-01	19.84
2018-03-01	20.01
2018-04-01	20.22
2018-05-01	20.04
2018-06-01	20.07
2018-07-01	19.95
2018-08-01	20.32
2018-09-01	20.06
2018-10-01	20.14
2018-11-01	19.97
2018-12-01	19.83
2019-01-01	19.87
2019-02-01	20.22
2019-03-01	20.27
2019-04-01	20.07
2019-05-01	20
2019-06-01	19.89
2019-07-01	20.11
2019-08-01	20.61
2019-09-01	20.88
2019-10-01	20.35
2019-11-01	20.33
2019-12-01	19.71
2020-01-01	19.88
2020-02-01	19.81
2020-03-01	20.07
2020-04-01	19.94
2020-05-01	19.87
2020-06-01	19.47
2020-07-01	19.59
2020-08-01	20.12
2020-09-01	20.14
2020-10-01	20.36
2020-11-01	20.09
2020-12-01	19.71
2021-01-01	19.02
2021-02-01	19.64
2021-03-01	19.67
2021-04-01	19.83
2021-05-01	19.99
2021-06-01	20.27
2021-07-01	19.91
2021-08-01	20.16
2021-09-01	20.32
2021-10-01	20.58
2021-11-01	20.22
2021-12-01	20.07
2022-01-01	19.68
2022-02-01	19.39
2022-03-01	19.57
2022-04-01	19.83
2022-05-01	19.98
2022-06-01	19.66
2022-07-01	19.86
2022-08-01	19.67
2022-09-01	19.65
2022-10-01	19.78
2022-11-01	19.76
2022-12-01	19.55
2023-01-01	20.24
2023-02-01	20.17
2023-03-01	20.75
2023-04-01	20.71
2023-05-01	20.74
2023-06-01	20.64
2023-07-01	20.61
2023-08-01	20.37
2023-09-01	20.4
2023-10-01	20.67
2023-11-01	20.91
2023-12-01	20.81
2024-01-01	20.63
2024-02-01	19.95
2024-03-01	20.21
2024-04-01	20.45
2024-05-01	20.22
2024-06-01	20.23
2024-07-01	20.15
2024-08-01	20.39
2024-09-01	20.22
2024-10-01	20.86
2024-11-01	21.25
2024-12-01	20.7
2025-01-01	20.58
2025-02-01	20.54
2025-03-01	20.05
2025-04-01	20.14
2025-05-01	20.22
2025-06-01	19.77
2025-07-01	19.66
2025-08-01	20.07
2025-09-01	20.51
2025-10-01	20.45
2025-11-01	20.62
2025-12-01	20.13
2026-01-01	20
2026-02-01	19.76
2026-03-01	19.57
2026-04-01	19.59
2026-05-01	19.7
2026-06-01	19.8
2026-07-01	19.72
2026-08-01	19.71
2026-09-01	19.74
2026-10-01	19.7
2026-11-01	19.95
2026-12-01	19.73
2027-01-01	19.6
2027-02-01	19.09
2027-03-01	19.74
2027-04-01	19.98
2027-05-01	20.19
2027-06-01	20.06
2027-07-01	20.07
2027-08-01	19.97
2027-09-01	20.27
2027-10-01	20.09
2027-11-01	20.13
2027-12-01	19.99

## Sheet: Palm Oil Quantity Based on FFB
	Palm Oil Quantity Based on Fresh Fruit Bunch (FFB) in Tonnes/Hectares
2014-01-01	1.49
2014-02-01	1.21
2014-03-01	1.39
2014-04-01	1.45
2014-05-01	1.53
2014-06-01	1.43
2014-07-01	1.55
2014-08-01	1.94
2014-09-01	1.8
2014-10-01	1.79
2014-11-01	1.68
2014-12-01	1.37
2015-01-01	1.15
2015-02-01	1.07
2015-03-01	1.33
2015-04-01	1.55
2015-05-01	1.64
2015-06-01	1.61
2015-07-01	1.68
2015-08-01	1.89
2015-09-01	1.81
2015-10-01	1.84
2015-11-01	1.57
2015-12-01	1.34
2016-01-01	1.04
2016-02-01	0.97
2016-03-01	1.1
2016-04-01	1.17
2016-05-01	1.27
2016-06-01	1.45
2016-07-01	1.47
2016-08-01	1.54
2016-09-01	1.57
2016-10-01	1.51
2016-11-01	1.46
2016-12-01	1.36
2017-01-01	1.2
2017-02-01	1.14
2017-03-01	1.32
2017-04-01	1.38
2017-05-01	1.45
2017-06-01	1.37
2017-07-01	1.61
2017-08-01	1.61
2017-09-01	1.62
2017-10-01	1.78
2017-11-01	1.75
2017-12-01	1.67
2018-01-01	1.48
2018-02-01	1.22
2018-03-01	1.38
2018-04-01	1.36
2018-05-01	1.32
2018-06-01	1.17
2018-07-01	1.28
2018-08-01	1.39
2018-09-01	1.62
2018-10-01	1.7
2018-11-01	1.63
2018-12-01	1.61
2019-01-01	1.52
2019-02-01	1.34
2019-03-01	1.42
2019-04-01	1.42
2019-05-01	1.4
2019-06-01	1.34
2019-07-01	1.49
2019-08-01	1.55
2019-09-01	1.57
2019-10-01	1.57
2019-11-01	1.35
2019-12-01	1.22
2020-01-01	1.06
2020-02-01	1.1
2020-03-01	1.19
2020-04-01	1.41
2020-05-01	1.44
2020-06-01	1.65
2020-07-01	1.59
2020-08-01	1.62
2020-09-01	1.65
2020-10-01	1.5
2020-11-01	1.33
2020-12-01	1.19
2021-01-01	1.03
2021-02-01	0.97
2021-03-01	1.2
2021-04-01	1.28
2021-05-01	1.33
2021-06-01	1.35
2021-07-01	1.3
2021-08-01	1.44
2021-09-01	1.45
2021-10-01	1.46
2021-11-01	1.41
2021-12-01	1.26
2022-01-01	1.1
2022-02-01	0.99
2022-03-01	1.18
2022-04-01	1.17
2022-05-01	1.2
2022-06-01	1.26
2022-07-01	1.28
2022-08-01	1.45
2022-09-01	1.51
2022-10-01	1.54
2022-11-01	1.45
2022-12-01	1.38
2023-01-01	1.49
2023-02-01	1.49
2023-03-01	1.21
2023-04-01	1.39
2023-05-01	1.45
2023-06-01	1.53
2023-07-01	1.43
2023-08-01	1.55
2023-09-01	1.94
2023-10-01	1.8
2023-11-01	1.79
2023-12-01	1.68
2024-01-01	1.37
2024-02-01	1.15
2024-03-01	1.07
2024-04-01	1.33
2024-05-01	1.55
2024-06-01	1.64
2024-07-01	1.61
2024-08-01	1.68
2024-09-01	1.89
2024-10-01	1.81
2024-11-01	1.84
2024-12-01	1.57
2025-01-01	1.34
2025-02-01	1.04
2025-03-01	0.97
2025-04-01	1.1
2025-05-01	1.17
2025-06-01	1.27
2025-07-01	1.45
2025-08-01	1.47
2025-09-01	1.54
2025-10-01	1.57
2025-11-01	1.51
2025-12-01	1.46
2026-01-01	1.36
2026-02-01	1.2
2026-03-01	1.14
2026-04-01	1.32
2026-05-01	1.38
2026-06-01	1.45
2026-07-01	1.37
2026-08-01	1.61
2026-09-01	1.61
2026-10-01	1.62
2026-11-01	1.78
2026-12-01	1.75
2027-01-01	1.67
2027-02-01	1.48
2027-03-01	1.22
2027-04-01	1.38
2027-05-01	1.36
2027-06-01	1.32
2027-07-01	1.17
2027-08-01	1.28
2027-09-01	1.39
2027-10-01	1.62
2027-11-01	1.7
2027-12-01	1.63

## Sheet: Palm Oil Quantity Based on Oil 
Date	Palm Oil Quantity Based on Oil Export Rate in Tonnes
2014-01-01	1367962
2014-02-01	1351441
2014-03-01	1245766
2014-04-01	1268648
2014-05-01	1416958
2014-06-01	1483191
2014-07-01	1446060
2014-08-01	1437795
2014-09-01	1643294
2014-10-01	1611459
2014-11-01	1514051
2014-12-01	1519622
2015-01-01	1191776
2015-02-01	972646
2015-03-01	1194230
2015-04-01	1177822
2015-05-01	1625592
2015-06-01	1697169
2015-07-01	1609902
2015-08-01	1608303
2015-09-01	1680882
2015-10-01	1711924
2015-11-01	1499757
2015-12-01	1484211
2016-01-01	1279187
2016-02-01	1088864
2016-03-01	1335934
2016-04-01	1172915
2016-05-01	1282453
2016-06-01	1141832
2016-07-01	1384720
2016-08-01	1824437
2016-09-01	1461173
2016-10-01	1436070
2016-11-01	1370411
2016-12-01	1267962
2017-01-01	1287782
2017-02-01	1107768
2017-03-01	1265800
2017-04-01	1284120
2017-05-01	1506145
2017-06-01	1379888
2017-07-01	1399107
2017-08-01	1488211
2017-09-01	1519284
2017-10-01	1538050
2017-11-01	1356378
2017-12-01	1427425
2018-01-01	1472666
2018-02-01	1243621
2018-03-01	1566183
2018-04-01	1530406
2018-05-01	1291627
2018-06-01	1129518
2018-07-01	1196672
2018-08-01	1099896
2018-09-01	1619482
2018-10-01	1578493
2018-11-01	1375685
2018-12-01	1383307
2019-01-01	1680892
2019-02-01	1324615
2019-03-01	1620752
2019-04-01	1654499
2019-05-01	1715719
2019-06-01	1397140
2019-07-01	1486485
2019-08-01	1736216
2019-09-01	1409089
2019-10-01	1641973
2019-11-01	1405638
2019-12-01	1398049
2020-01-01	1213569
2020-02-01	1089529
2020-03-01	1184973
2020-04-01	1236478
2020-05-01	1369351
2020-06-01	1706635
2020-07-01	1783284
2020-08-01	1578075
2020-09-01	1612155
2020-10-01	1674380
2020-11-01	1303807
2020-12-01	1642835
2021-01-01	947392
2021-02-01	900558
2021-03-01	1189859
2021-04-01	1350777
2021-05-01	1268424
2021-06-01	1418494
2021-07-01	1402315
2021-08-01	1167188
2021-09-01	1611518
2021-10-01	1420391
2021-11-01	1465518
2021-12-01	1423821
2022-01-01	1155826
2022-02-01	1111507
2022-03-01	1281461
2022-04-01	1068238
2022-05-01	1369714
2022-06-01	1193917
2022-07-01	1321340
2022-08-01	1298184
2022-09-01	1419235
2022-10-01	1505769
2022-11-01	1513031
2022-12-01	1473846
2023-01-01	1351352
2023-02-01	1361685
2023-03-01	1355312
2023-04-01	1287164
2023-05-01	1275645
2023-06-01	1363556
2023-07-01	1437981
2023-08-01	1443007
2023-09-01	1439765
2023-10-01	1566380
2023-11-01	1594424
2023-12-01	1544424
2024-01-01	1528995
2024-02-01	1319211
2024-03-01	1103613
2024-04-01	1159986
2024-05-01	1171082
2024-06-01	1453832
2024-07-01	1605212
2024-08-01	1608130
2024-09-01	1608237
2024-10-01	1653430
2024-11-01	1689819
2024-12-01	1571582
2025-01-01	1517228
2025-02-01	1369143
2025-03-01	1194782
2025-04-01	1282592
2025-05-01	1214362
2025-06-01	1256721
2025-07-01	1185249
2025-08-01	1309340
2025-09-01	1629781
2025-10-01	1524890
2025-11-01	1469635
2025-12-01	1407908
2026-01-01	1320848
2026-02-01	1300278
2026-03-01	1180518
2026-04-01	1233572
2026-05-01	1265018
2026-06-01	1415023
2026-07-01	1393165
2026-08-01	1396862
2026-09-01	1453690
2026-10-01	1494496
2026-11-01	1521591
2026-12-01	1418812
2027-01-01	1424170
2027-02-01	1454339
2027-03-01	1323252
2027-04-01	1474379
2027-05-01	1509233
2027-06-01	1373861
2027-07-01	1221855
2027-08-01	1206189
2027-09-01	1140064
2027-10-01	1438310
2027-11-01	1525518
2027-12-01	1432307
